# Supplementary material for: Hematologic malignancies among patients at Al-Amal Oncology Center in Ibb Governorate, Yemen
Source: Research Square preprint supplement (doi:10.21203/rs.3.rs-6849395/v1), 2025-06-11
Supplement: Supplementary file 1 [file 1ef0a0b764bc5d929496157f.docx]

Table 1. Sociodemographic characteristics distribution of studied patients with haematological malignancies

| Hematological Malignancies | | | |
| --- | --- | --- | --- |
| Factor | No. |  | |
|  | No. | % | *P** value |
| Age (year  1 to 21  22 – 43  44 – 64  65 – 86  ≥87 | 270  293  255  141  20 | 27.6  29.93  26.05  14.4  2.4 | 0.00 |
| Gender  Male  Female | 549  430 | 56.1  43.9 | 0.919 |
| Marital status  Married  Unmarried | 607  372 | 62  38 | 0.00 |
| Residence  Urban  Rural | 187  792 | 19.1  80.9 | 0.944 |
| Education level  Illiterate  Basic  Secondary  Graduated | 512  327  82  58 | 52.3  33.4  8.4  5.9 | 0.00 |
| Genetic status  Yes  No | 28  951 | 2.86  97.14 | 0.827 |

* p < 0.05 is considered as significant.
